# Supplementary material for: Solution processed low-cost and highly electrocatalytic composite NiS/PbS nanostructures as a novel counter-electrode material for high-performance quantum dot-sensitized solar cells with improved stability
Source: Royal Society of Chemistry journal article supplement (doi:10.1039/c5tc03138a), 2015-01-01
Supplement: c5tc03138a1.pdf [file c5tc03138a1.pdf]

## Supporting Information

### **Solution Processed Low-Cost and Highly Electrocatalytic Composite NiS/PbS Nanostructures as a Novel Counter Electrode Material for High-Performance Quantum Dot-Sensitized Solar Cells with Improved Stability**

Chandu V.V.M. Gopi, Mallineni Venkata-Haritha, Seenu Ravi, Chebrolu Venkata Thulasi-Varma,  
Soo-Kyoung Kim, Hee-Je Kim\*

*School of Electrical Engineering, Pusan National University, Busandaehak-ro 63beon-gil,  
Geumjeong-gu, Busan, 46241, South Korea*

\*Corresponding authors. Tel.: +82 51 510 2364; fax: +82 51 513 0212

E-mail: [heeje@pusan.ac.kr](mailto:heeje@pusan.ac.kr) (H.-J. Kim)

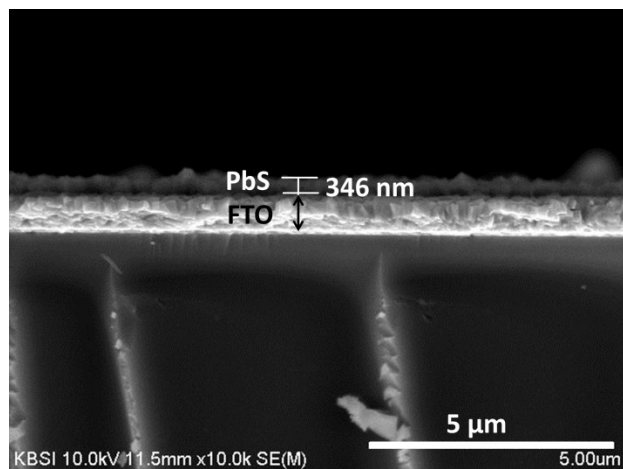

**Fig. S1.** Cross-sectional image of PbS thin film on the surface of FTO substrate.

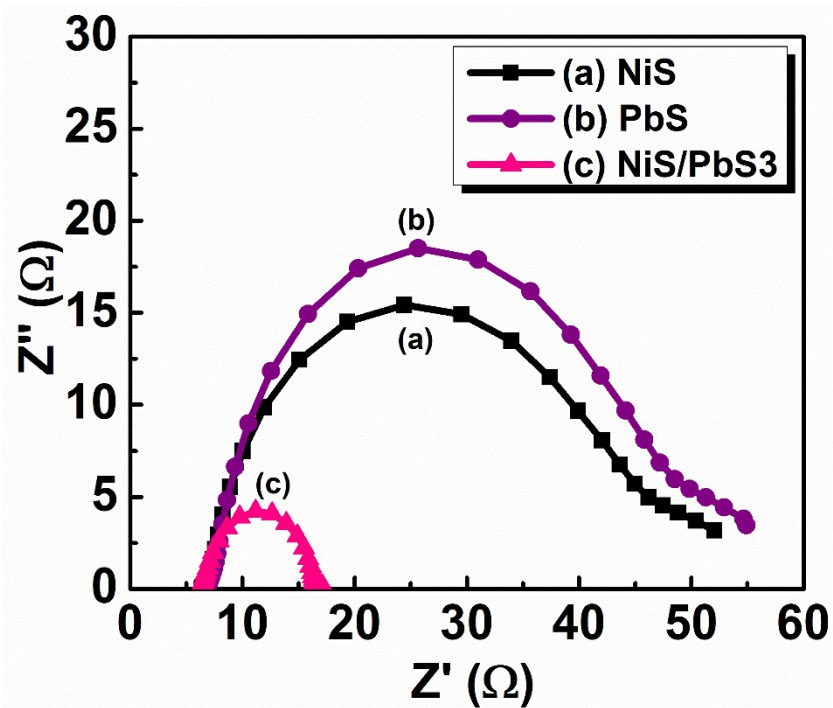

**Fig. S2.** Nyquist plots for the symmetric cell configuration consisting of two identical (a) NiS, (b) PbS, and (c) NiS/PbS3 CEs.

**Table S1** EIS parameters extracted from fabricated symmetrical cells of NiS, PbS and NiS/PbS3 CEs, and the cells filled with a polysulfide electrolyte solution (1 M Na<sub>2</sub>S, 2 M S, and 0.1 M KCl)

| CEs      | $R_s$ ( $\Omega$ ) | $R_{ct}$ ( $\Omega$ ) | CPE ( $\mu$ F) | $Z_w$ ( $\Omega$ ) |
|----------|--------------------|-----------------------|----------------|--------------------|
| NiS      | 6.63               | 39.65                 | 137.2          | 6.19               |
| PbS      | 6.75               | 42.12                 | 124.8          | 6.31               |
| NiS/PbS3 | 6.34               | 10.06                 | 783.1          | 0.96               |

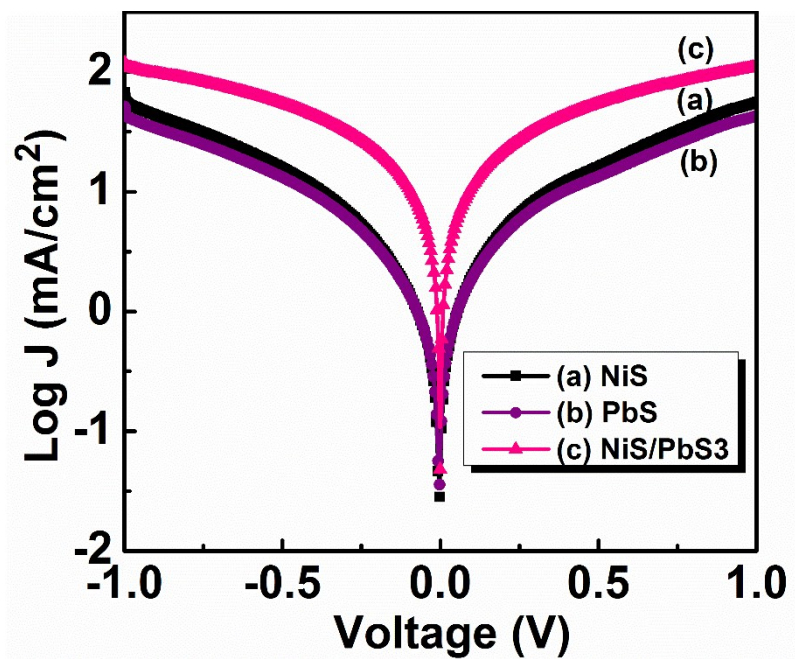

**Fig. S3.** Tafel curves of the symmetrical dummy cells fabricated with NiS, PbS and NiS/PbS3 CEs.

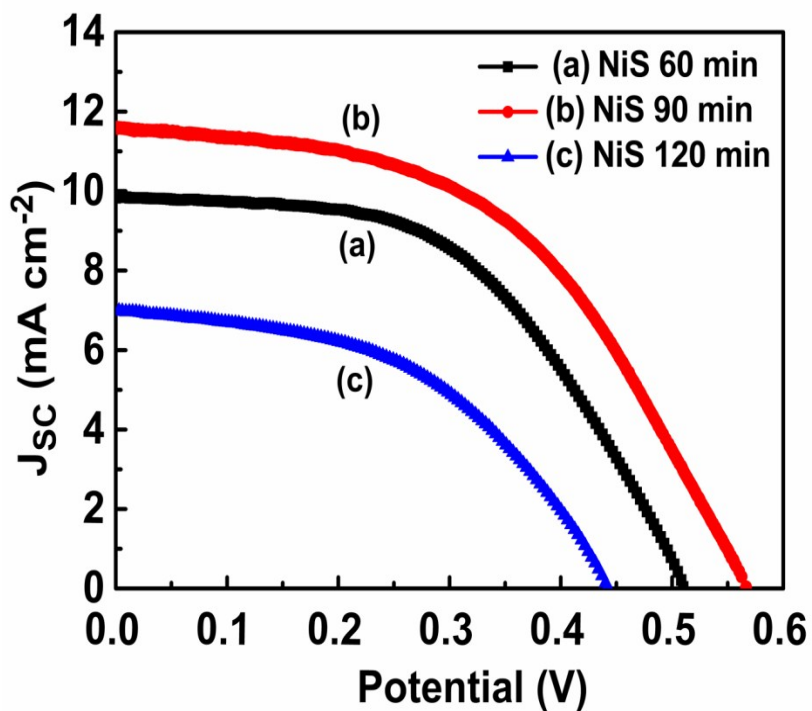

**Fig. S4.** Power conversion efficiency optimization using J-V curves of QDSSC based on NiS CE at different temperature with polysulfide electrolyte.

**Table S2** photovoltaic parameters of QDSSCs made with different NiS CEs

| Cell        | $V_{oc}$ (V) | $J_{sc}$ ( $\text{mA}/\text{cm}^2$ ) | FF    | $\eta\%$ |
|-------------|--------------|--------------------------------------|-------|----------|
| NiS 60 min  | 0.5120       | 9.84                                 | 0.519 | 2.60     |
| NiS 90 min  | 0.566        | 11.60                                | 0.496 | 3.26     |
| NiS 120 min | 0.442        | 7.29                                 | 0.460 | 1.48     |

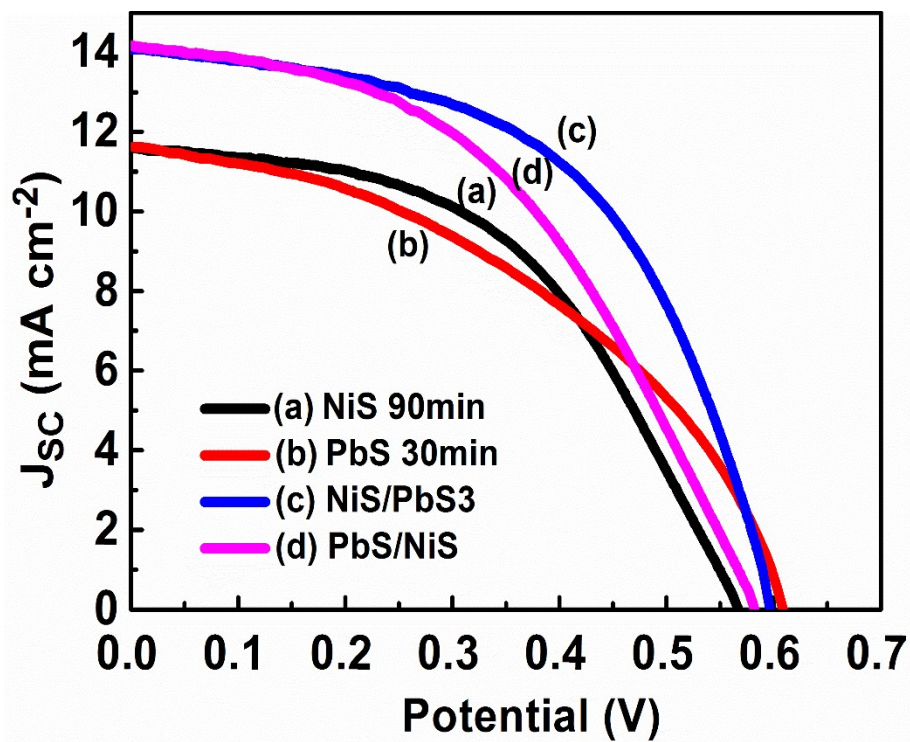

**Fig. S5.** Photocurrent-voltage characteristics of  $\text{TiO}_2/\text{CdS}/\text{CdSe}/\text{ZnS}$  QDSSCs with the NiS, PbS, NiS/PbS and PbS/NiS CEs under the illumination of AM 1.5G.

**Table S3** photovoltaic parameters of NiS, PbS, NiS/PbS and PbS/NiS CEs based CdS/CdSe/ZnS QDSSCs.

| Cell             | $V_{oc}$ (V) | $J_{sc}$ ( $\text{mA}/\text{cm}^2$ ) | FF    | $\eta\%$ |
|------------------|--------------|--------------------------------------|-------|----------|
| NiS 90 min (NiS) | 0.566        | 11.60                                | 0.496 | 3.26     |
| PbS 30 min (PbS) | 0.608        | 11.61                                | 0.432 | 3.06     |
| NiS/PbS3         | 0.596        | 14.08                                | 0.539 | 4.52     |
| PbS/NiS          | 0.581        | 14.17                                | 0.460 | 3.79     |
